# Supplementary material for: SARS-CoV-2 Disinfection of Air and Surface Contamination by TiO2 Photocatalyst-Mediated Damage to Viral Morphology, RNA, and Protein
Source: MDPI journal article supplement (doi:10.3390/v13050942), 2021-05-20
Supplement: s1 [file s1]

# **Supplementary Materials**

## **Title**

**SARS-CoV-2 disinfection by TiO<sub>2</sub> photocatalyst via damage to viral morphology, RNA and protein**

## **Author**

Ryosuke Matsuura, Chieh-Wen Lo, Satoshi Wada, Junichi Somei, Heihachiro Ochiai, Takeharu Murakami, Norihito Saito, Takayo Ogawa, Atsushi Shinjo, Yoshimi Benno, Masaru Nakagawa, Masami Takei and Yoko Aida

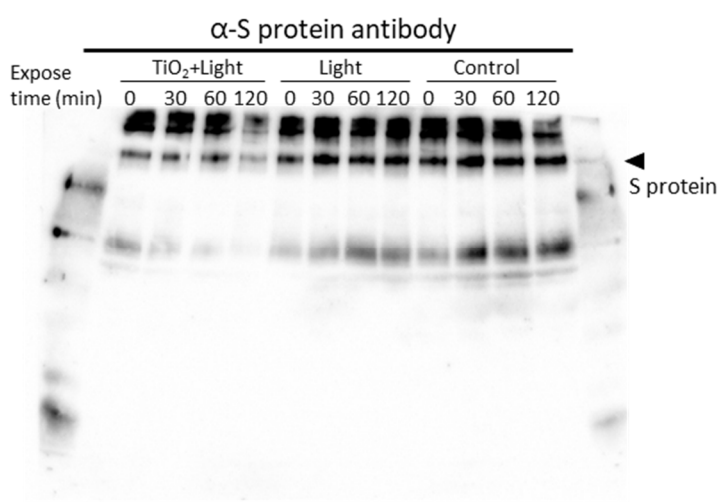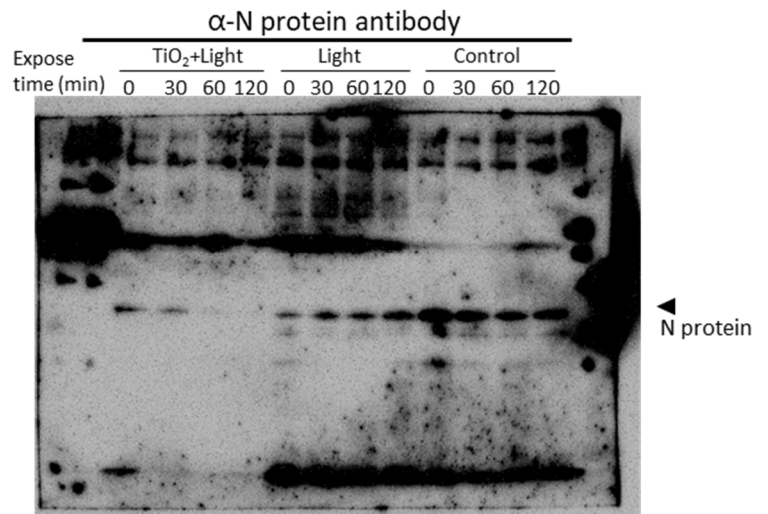

Figure S1. Original Images for Blots. Immunoblot images of viral spike (S) protein and nucleocapsid (N) proteins of SARS-CoV-2 treated with photocatalytic reaction. SARS-CoV-2 virus 1 mL with titer  $1.78 \times 10^6$  TCID<sub>50</sub>/mL on TiO<sub>2</sub>-coated sheet were treated with photocatalytic reaction for 0, 30, 60 and 120 minutes. Positions of S and N proteins are indicated.
